# Supplementary material for: Residual Cholesterol Inflammation Index as a Predictive Biomarker for Stroke Risk in Middle-Aged and Elderly Individuals: Insights from the China Health and Retirement Longitudinal Study
Source: Research Square preprint supplement (doi:10.21203/rs.3.rs-8788904/v1), 2026-02-16
Supplement: Supplementary file 1 [file 086049101f80b60999b852a4.docx]

Table S17 Logistic regression analysis of the relationship between RCII and stroke incidence according to glucose regulation state.

| GMS | Characteristic | Crude,OR(95%CI) | Model1,OR(95%CI) | Model2,OR(95%CI) |
| --- | --- | --- | --- | --- |
| NGR | Quartile1 | Reference | Reference | Reference |
|  | Quartile2 | 1.150(0.762,1.737) | 1.119(0.739,1.692) | 0.978(0.640,1.492) |
|  | Quartile3 | 1.599(1.081,2.376) | 1.510(1.017,2.251) | 1.157(0.766,1.753) |
|  | Quartile4 | 2.192(1.473,3.275) | 2.076(1.391,3.111) | 1.453(0.946,2.238) |
|  | P for trend | 0.003 | 0.008 | 0.12 |
|  | Per 1SD increase | 1.157(1.042,1.269) | 1.145(1.029,1.259) | 1.091(0.969,1.209) |
| Pre-DM | Quartile1 | Reference | Reference | Reference |
|  | Quartile2 | 1.240(0.857,1.804) | 1.237(0.853,1.804) | 1.120(0.767,1.646) |
|  | Quartile3 | 1.498(1.050,2.156) | 1.488(1.040,2.148) | 1.178(0.809,1.729) |
|  | Quartile4 | 1.789(1.273,2.542) | 1.774(1.258,2.529) | 1.288(0.887,1.887) |
|  | P for trend | <0.001 | <0.001 | 0.004 |
|  | Per 1SD increase | 1.219(1.115,1.325) | 1.214(1.109,1.322) | 1.148(1.042,1.257) |
| DM | Quartile1 | Reference | Reference | Reference |
|  | Quartile2 | 1.221(0.584,2.652) | 1.249(0.594,2.725) | 1.172(0.547,2.599) |
|  | Quartile3 | 1.709(0.890,3.506) | 1.668(0.863,3.440) | 1.306(0.656,2.759) |
|  | Quartile4 | 1.941(1.055,3.869) | 2.000(1.080,4.007) | 1.441(0.739,3.009) |
|  | P for trend | 0.012 | 0.007 | 0.084 |
|  | Per 1SD increase | 1.212(1.036,1.401) | 1.232(1.050,1.427) | 1.159(0.972,1.362) |

Crude: unadjusted for any covariates;

Model 1: adjusted for age, gender, smoking status, drinking status, residence, education level and marital status;

Model 2: adjusted for variables included in Model 2 and SBP, DBP, BMI, hypertension, dyslipidemia, diabetes, liver disease and kidney disease.

Abbreviations: BMI, body mass index; SBP, systolic blood pressure; DBP, diastolic blood pressure; RCII: Residual cholesterol inflammatory index; GMS, glucose regulation state; NGR, normal glucose regulation; Pre-DM, prediabetes mellitus; DM, diabetes mellitus; OR, odds ratio; CI, confidence interval; SD, standard deviation.
