# Supplementary material for: Residual Cholesterol Inflammation Index as a Predictive Biomarker for Stroke Risk in Middle-Aged and Elderly Individuals: Insights from the China Health and Retirement Longitudinal Study
Source: Research Square preprint supplement (doi:10.21203/rs.3.rs-8788904/v1), 2026-02-16
Supplement: Supplementary file 1 [file d2b9608ce6eeee20f65f2cd9.docx]

Table 4 Association between the RCII and stroke incidence according to age.

| Age | Characteristic | Crude,HR(95%CI) | Model1,HR(95%CI) | Model2,HR(95%CI) |
| --- | --- | --- | --- | --- |
| Age 45-60 | Quartile1 | Reference | Reference | Reference |
|  | Quartile2 | 1.487(1.015,2.181) | 1.448(0.987,2.124) | 1.364(0.924,2.013) |
|  | Quartile3 | 1.692(1.162,2.463) | 1.631(1.119,2.376) | 1.251(0.842,1.858) |
|  | Quartile4 | 3.026(2.147,4.264) | 2.947(2.088,4.161) | 2.105(1.435,3.090) |
|  | P for trend | <0.001 | <0.001 | <0.001 |
|  | Per 1SD increase | 1.259(1.178,1.345) | 1.261(1.178,1.349) | 1.182(1.096,1.275) |
| Age ≥60 | Quartile1 | Reference | Reference | Reference |
|  | Quartile2 | 1.088(0.772,1.533) | 1.089(0.773,1.535) | 0.988(0.699,1.396) |
|  | Quartile3 | 1.443(1.050,1.982) | 1.439(1.047,1.981) | 1.154(0.831,1.602) |
|  | Quartile4 | 1.339(0.969,1.851) | 1.307(0.944,1.810) | 0.938(0.686,1.367) |
|  | P for trend | 0.029 | 0.04 | 0.509 |
|  | Per 1SD increase | 1.107(1.010,1.212) | 1.101(1.004,1.207) | 1.035(0.935,1.145) |

Crude: unadjusted for any covariates;

Model 1: adjusted for age, gender, smoking status, drinking status, residence, education level and marital status;

Model 2: adjusted for variables included in Model 2 and SBP, DBP, BMI, hypertension, dyslipidemia, diabetes, liver disease and kidney disease.

Abbreviations: BMI, body mass index; SBP, systolic blood pressure; DBP, diastolic blood pressure; RCII: Residual cholesterol inflammatory index; HR, Hazard ratio; CI, confidence interval; SD, standard deviation.
