# Supplementary material for: Residual Cholesterol Inflammation Index as a Predictive Biomarker for Stroke Risk in Middle-Aged and Elderly Individuals: Insights from the China Health and Retirement Longitudinal Study
Source: Research Square preprint supplement (doi:10.21203/rs.3.rs-8788904/v1), 2026-02-16
Supplement: Supplementary file 2 [file 116d7a4ab6aadba551beada6.docx]

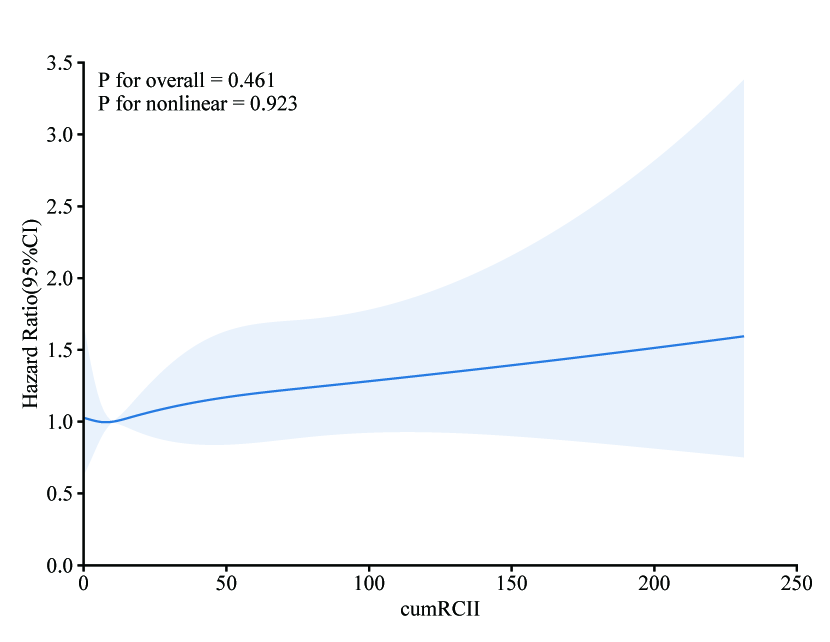


Figure. S3 Association of the cumRCII index and the risk of stroke.

Adjusted for age, gender, smoking status, drinking status, residence, education level, marital status, SBP, DBP, BMI, hypertension, dyslipidemia, diabetes, liver disease and kidney disease.

Abbreviations: cumRCII: cumulative remnant cholesterol inflammatory index; BMI, body mass index; SBP, systolic blood pressure; DBP, diastolic blood pressure.
