# Supplementary material for: Residual Cholesterol Inflammation Index as a Predictive Biomarker for Stroke Risk in Middle-Aged and Elderly Individuals: Insights from the China Health and Retirement Longitudinal Study
Source: Research Square preprint supplement (doi:10.21203/rs.3.rs-8788904/v1), 2026-02-16
Supplement: Supplementary file 3 [file 18bbfdccf8cae95dad3a5155.docx]

| Table S13 Association between the RCII and stroke incidence after excluding deceased participants. | | | | | | |
| --- | --- | --- | --- | --- | --- | --- |
| RCII | Quartiles | | | | | Continuous |
| Quartile1 | Quartile2 | Quartile3 | Quartile4 | P for trend | Per 1SD increase |
| Crude,HR(95%CI) | Reference | 1.273(0.973,1.666) | 1.599(1.237,2.067) | 2.256(1.768,2.878) | <0.001 | 1.219(1.155,1.287) |
| Model1,HR(95%CI) | Reference | 1.242(0.949,1.625) | 1.545(1.194,1.998) | 2.176(1.704,2.779) | <0.001 | 1.210(1.146,1.277) |
| Model2,HR(95%CI) | Reference | 1.112(0.848,1.459) | 1.188(0.910,1.552) | 1.534(1.177,2.001) | <0.001 | 1.148(1.081,1.219) |

Crude: unadjusted for any covariates;

Model 1: adjusted for age, gender, smoking status, drinking status, residence, education level and marital status;

Model 2: adjusted for variables included in Model 2 and SBP, DBP, BMI, hypertension, dyslipidemia, diabetes, liver disease and kidney disease.

Abbreviations: BMI, body mass index; SBP, systolic blood pressure; DBP, diastolic blood pressure; RCII: Residual cholesterol inflammatory index; HR, Hazard ratio; CI, confidence interval; SD, standard deviation.
