# Supplementary material for: Residual Cholesterol Inflammation Index as a Predictive Biomarker for Stroke Risk in Middle-Aged and Elderly Individuals: Insights from the China Health and Retirement Longitudinal Study
Source: Research Square preprint supplement (doi:10.21203/rs.3.rs-8788904/v1), 2026-02-16
Supplement: Supplementary file 4 [file 196ca852b07f3a2f6271b08e.docx]

Table S18 Logistic regression analysis of the relationship between RCII and stroke incidence according to age

| Age | Characteristic | Crude,OR(95%CI) | Model1,OR(95%CI) | Model2,OR(95%CI) |
| --- | --- | --- | --- | --- |
| Age 45-60 | Quartile1 | Reference | Reference | Reference |
|  | Quartile2 | 1.439(0.976,2.139) | 1.406(0.952,2.092) | 1.276(0.856,1.915) |
|  | Quartile3 | 1.655(1.131,2.445) | 1.598(1.090,2.365) | 1.224(0.817,1.848) |
|  | Quartile4 | 2.995(2.120,4.303) | 2.906(2.051,4.184) | 2.028(1.376,3.029) |
|  | P for trend | <0.001 | <0.001 | <0.001 |
|  | Per 1SD increase | 1.295(1.196,1.397) | 1.296(1.195,1.399) | 1.231(1.125,1.341) |
| Age ≥60 | Quartile1 | Reference | Reference | Reference |
|  | Quartile2 | 1.069(0.747,1.531) | 1.058(0.738,1.518) | 0.946(0.656,1.366) |
|  | Quartile3 | 1.466(1.052,2.055) | 1.452(1.040,2.039) | 1.145(0.808,1.630) |
|  | Quartile4 | 1.327(0.947,1.870) | 1.275(0.906,1.802) | 0.911(0.632,1.319) |
|  | P for trend | 0.044 | 0.061 | 0.678 |
|  | Per 1SD increase | 1.107(0.998,1.216) | 1.100(0.990,1.211) | 1.023(0.912,1.135) |

Crude: unadjusted for any covariates;

Model 1: adjusted for age, gender, smoking status, drinking status, residence, education level and marital status;

Model 2: adjusted for variables included in Model 2 and SBP, DBP, BMI, hypertension, dyslipidemia, diabetes, liver disease and kidney disease.

Abbreviations: BMI, body mass index; SBP, systolic blood pressure; DBP, diastolic blood pressure; RCII: Residual cholesterol inflammatory index; GMS, glucose regulation state; NGR, normal glucose regulation; Pre-DM, prediabetes mellitus; DM, diabetes mellitus; OR, odds ratio; CI, confidence interval; SD, standard deviation.
