# Supplementary material for: Residual Cholesterol Inflammation Index as a Predictive Biomarker for Stroke Risk in Middle-Aged and Elderly Individuals: Insights from the China Health and Retirement Longitudinal Study
Source: Research Square preprint supplement (doi:10.21203/rs.3.rs-8788904/v1), 2026-02-16
Supplement: Supplementary file 5 [file 1f69424a0765996f21563e17.docx]

Table S15 Association between the RCII and stroke incidence according to age after excluding deceased participants.

| Age | Characteristic | Crude,HR(95%CI) | Model1,HR(95%CI) | Model2,HR(95%CI) |
| --- | --- | --- | --- | --- |
| Age 45-60 | Quartile1 | Reference | Reference | Reference |
|  | Quartile2 | 1.447(0.975,2.146) | 1.405(0.946,2.086) | 1.308(0.875,1.955) |
|  | Quartile3 | 1.678(1.142,2.467) | 1.618(1.099,2.380) | 1.231(0.821,1.846) |
|  | Quartile4 | 3.187(2.247,4.521) | 3.127(2.201,4.443) | 2.234(1.512,3.300) |
|  | P for trend | <0.001 | <0.001 | <0.001 |
|  | Per 1SD increase | 1.279(1.197,1.367) | 1.286(1.202,1.376) | 1.234(1.144,1.332) |
| Age ≥60 | Quartile1 | Reference | Reference | Reference |
|  | Quartile2 | 1.111(0.769,1.605) | 1.100(0.761,1.590) | 0.991(0.684,1.436) |
|  | Quartile3 | 1.479(1.049,2.088) | 1.459(1.033,2.062) | 1.180(0.827,1.684) |
|  | Quartile4 | 1.507(1.066,2.131) | 1.429(1.008,2.026) | 1.059(0.731,1.534) |
|  | P for trend | 0.005 | 0.008 | 0.185 |
|  | Per 1SD increase | 1.141(1.041,1.251) | 1.135(1.034,1.247) | 1.072(0.967,1.188) |

Crude: unadjusted for any covariates;

Model 1: adjusted for age, gender, smoking status, drinking status, residence, education level and marital status;

Model 2: adjusted for variables included in Model 2 and SBP, DBP, BMI, hypertension, dyslipidemia, diabetes, liver disease and kidney disease.

Abbreviations: BMI, body mass index; SBP, systolic blood pressure; DBP, diastolic blood pressure; RCII: Residual cholesterol inflammatory index; HR, Hazard ratio; CI, confidence interval; SD, standard deviation.
