# Supplementary material for: Residual Cholesterol Inflammation Index as a Predictive Biomarker for Stroke Risk in Middle-Aged and Elderly Individuals: Insights from the China Health and Retirement Longitudinal Study
Source: Research Square preprint supplement (doi:10.21203/rs.3.rs-8788904/v1), 2026-02-16
Supplement: Supplementary file 6 [file 248c28637a416ad8e3a96963.docx]

Table S 11 Association between the RCII and stroke incidence according to glucose regulation state after excluding participants with not fasting.

| GMS | Characteristic | Crude,HR(95%CI) | Model1,HR(95%CI) | Model2,HR(95%CI) |
| --- | --- | --- | --- | --- |
| NGR | Quartile1 | Reference | Reference | Reference |
|  | Quartile2 | 1.264(0.824,1.940) | 1.225(0.798,1.881) | 1.105(0.716,1.706) |
|  | Quartile3 | 1.793(1.192,2.695) | 1.719(1.140,2.591) | 1.273(0.832,1.948) |
|  | Quartile4 | 2.483(1.651,3.732) | 2.365(1.570,3.563) | 1.590(1.024,2.469) |
|  | P for trend | 0.003 | 0.006 | 0.212 |
|  | Per 1SD increase | 1.146(1.049,1.252) | 1.135(1.037,1.243) | 1.067(0.964,1.181) |
| Pre-DM | Quartile1 | Reference | Reference | Reference |
|  | Quartile2 | 1.376(0.952,1.989) | 1.348(0.932,1.949) | 1.217(0.838,1.768) |
|  | Quartile3 | 1.564(1.095,2.233) | 1.538(1.075,2.200) | 1.196(0.825,1.732) |
|  | Quartile4 | 1.907(1.352,2.691) | 1.885(1.333,2.665) | 1.351(0.934,1.955) |
|  | P for trend | <0.001 | <0.001 | <0.001 |
|  | Per 1SD increase | 1.256(1.162,1.358) | 1.258(1.163,1.361) | 1.190(1.093,1.296) |
| DM | Quartile1 | Reference | Reference | Reference |
|  | Quartile2 | 1.243(0.599,2.583) | 1.299(0.624,2.706) | 1.157(0.551,2.432) |
|  | Quartile3 | 1.587(0.817,3.082) | 1.519(0.779,2.958) | 1.069(0.536,2.135) |
|  | Quartile4 | 1.655(0.881,3.108) | 1.652(0.876,3.113) | 1.102(0.560,2.169) |
|  | P for trend | 0.102 | 0.077 | 0.473 |
|  | Per 1SD increase | 1.133(0.976,1.316) | 1.147(0.985,1.335) | 1.064(0.898,1.261) |

Crude: unadjusted for any covariates;

Model 1: adjusted for age, gender, smoking status, drinking status, residence, education level and marital status;

Model 2: adjusted for variables included in Model 2 and SBP, DBP, BMI, hypertension, dyslipidemia, diabetes, liver disease and kidney disease.

Abbreviations: BMI, body mass index; SBP, systolic blood pressure; DBP, diastolic blood pressure; RCII: Residual cholesterol inflammatory index; GMS, glucose regulation state; NGR, normal glucose regulation; Pre-DM, prediabetes mellitus; DM, diabetes mellitus; HR, Hazard ratio; CI, confidence interval; SD, standard deviation.
