# Supplementary material for: Residual Cholesterol Inflammation Index as a Predictive Biomarker for Stroke Risk in Middle-Aged and Elderly Individuals: Insights from the China Health and Retirement Longitudinal Study
Source: Research Square preprint supplement (doi:10.21203/rs.3.rs-8788904/v1), 2026-02-16
Supplement: Supplementary file 7 [file 2881539e99d4d8e9be460ae2.docx]

Table S3 Baseline characteristics participants according to the quartile of cumulative average RCII

| Characteristic | Overall | RCII quartiles | | | | p |
| --- | --- | --- | --- | --- | --- | --- |
| Q1 | Q2 | Q3 | Q4 |
| No. of subjects | 5962 | 1491 | 1490 | 1490 | 1491 |  |
| Gender (%) |  |  |  |  |  | 0.001 |
| Male | 2671 (44.8) | 718 (48.2) | 694 (46.6) | 626 (42.0) | 633 (42.5) |  |
| Female | 3291 (55.2) | 773 (51.8) | 796 (53.4) | 864 (58.0) | 858 (57.5) |  |
| Age,year(mean (SD)) | 58.30 (8.51) | 57.69 (8.49) | 58.56 (8.43) | 58.35 (8.63) | 58.58 (8.47) | 0.014 |
| Marital status (%) |  |  |  |  |  | 0.063 |
| Marryed | 5117 (85.8) | 1268 (85.0) | 1296 (87.0) | 1297 (87.0) | 1256 (84.2) |  |
| Other | 845 (14.2) | 223 (15.0) | 194 (13.0) | 193 (13.0) | 235 (15.8) |  |
| Education level (%) |  |  |  |  |  | 0.421 |
| Elementary school or below | 4184 (70.2) | 1027 (68.9) | 1059 (71.1) | 1045 (70.1) | 1053 (70.6) |  |
| Middle school | 1614 (27.1) | 427 (28.6) | 390 (26.2) | 409 (27.4) | 388 (26.0) |  |
| College or above | 164 (2.8) | 37 (2.5) | 41 (2.8) | 36 (2.4) | 50 (3.4) |  |
| Residence (%) |  |  |  |  |  | 0.004 |
| Rural | 5054 (84.8) | 1279 (85.8) | 1283 (86.1) | 1271 (85.3) | 1221 (81.9) |  |
| Urban | 908 (15.2) | 212 (14.2) | 207 (13.9) | 219 (14.7) | 270 (18.1) |  |
| BMI,kg/m2 (median (IQR)) | 23.24 [20.97, 25.92] | 21.68 [20.00, 23.73] | 23.03 [20.86, 25.51] | 23.93 [21.69, 26.57] | 24.64 [22.17, 27.57] | <0.001 |
| SBP,mmHg (mean (SD)) | 128.03 (20.61) | 123.58 (19.18) | 126.56 (20.01) | 129.73 (20.26) | 132.25 (21.89) | <0.001 |
| DBP,mmHg (mean (SD)) | 74.79 (11.91) | 72.15 (11.31) | 73.78 (11.68) | 75.99 (11.71) | 77.25 (12.26) | <0.001 |
| Smoking status (%) |  |  |  |  |  | 0.049 |
| Never | 3708 (62.2) | 913 (61.2) | 909 (61.0) | 949 (63.7) | 937 (62.8) |  |
| Former | 476 (8.0) | 102 (6.8) | 114 (7.7) | 128 (8.6) | 132 (8.9) |  |
| Current | 1778 (29.8) | 476 (31.9) | 467 (31.3) | 413 (27.7) | 422 (28.3) |  |
| Drinking status (%) |  |  |  |  |  | 0.003 |
| Never | 3690 (61.9) | 892 (59.8) | 906 (60.8) | 951 (63.8) | 941 (63.1) |  |
| Former | 468 (7.8) | 93 (6.2) | 134 (9.0) | 118 (7.9) | 123 (8.2) |  |
| Current | 1804 (30.3) | 506 (33.9) | 450 (30.2) | 421 (28.3) | 427 (28.6) |  |
| Dyslipidemia (%) | 2896 (48.6) | 347 (23.3) | 620 (41.6) | 843 (56.6) | 1086 (72.8) | <0.001 |
| Hypertension (%) | 2285 (38.3) | 405 (27.2) | 503 (33.8) | 635 (42.6) | 742 (49.8) | <0.001 |
| Diabetes (%) | 969 (16.3) | 134 ( 9.0) | 212 (14.2) | 238 (16.0) | 385 (25.8) | <0.001 |
| Kidney disease (%) | 326 (5.5) | 86 (5.8) | 75 (5.0) | 81 (5.4) | 84 (5.6) | 0.829 |
| Liver diseasee (%) | 201 (3.4) | 47 (3.2) | 54 (3.6) | 61 (4.1) | 39 (2.6) | 0.138 |
| Lipid-lowering treatment (%) | 326 (5.5) | 39 (2.6) | 57 (3.8) | 75 (5.0) | 155 (10.4) | <0.001 |
| Antihypertensive treatment (%) | 1122 (18.8) | 167 (11.2) | 224 (15.0) | 323 (21.7) | 408 (27.4) | <0.001 |
| Hypoglycemic treatment(%) | 230 (3.9) | 27 (1.8) | 55 (3.7) | 58 (3.9) | 90 (6.0) | <0.001 |
| HbA1c,%(mean (SD)) | 5.26 (0.80) | 5.12 (0.58) | 5.22 (0.69) | 5.27 (0.79) | 5.43 (1.02) | <0.001 |
| FBG (median (IQR)) | 102.24 [94.50, 112.32] | 99.54 [92.88, 107.10] | 101.79 [94.32, 111.06] | 102.42 [94.50, 112.68] | 105.84 [97.20, 121.77] | <0.001 |
| TG,mg/dl (median (IQR)) | 106.20 [75.22, 153.99] | 77.00 [60.18, 100.89] | 99.12 [74.34, 132.75] | 117.71 [85.85, 165.49] | 157.53 [106.20, 232.31] | <0.001 |
| TC,mg/dl (median (IQR)) | 190.21 [167.40, 214.56] | 183.25 [160.44, 204.51] | 188.27 [165.17, 212.15] | 192.14 [170.10, 216.88] | 199.87 [173.20, 225.39] | <0.001 |
| HDL-c,mg/dl (median (IQR)) | 49.48 [40.59, 59.92] | 56.44 [47.17, 66.50] | 51.22 [43.30, 60.70] | 47.75 [39.14, 56.44] | 41.75 [34.02, 51.80] | <0.001 |
| LDL-c,mg/dl (median (IQR)) | 114.05 [93.56, 136.86] | 110.95 [91.82, 130.28] | 114.43 [95.10, 136.86] | 116.75 [96.26, 140.34] | 114.82 [91.62, 141.50] | <0.001 |
| hs-CRP,mg/l (median (IQR)) | 0.99 [0.54, 2.01] | 0.49 [0.34, 0.74] | 0.80 [0.53, 1.29] | 1.30 [0.76, 2.17] | 2.59 [1.27, 5.24] | <0.001 |
| stroke (%) | 379 (6.4) | 71 (4.8) | 86 (5.8) | 96 (6.4) | 126 (8.5) | <0.001 |

Abbreviations: BMI, body mass index; SBP, systolic blood pressure; DBP, diastolic blood pressure; HbA1c, glycosylated hemoglobin A1c; FBG, fasting blood glucose; TG, triglyceride; TC,total cholesterol; HDL-c, high-density lipoprotein cholesterol; LDL-c, low-density lipoprotein cholesterol; hs-CRP: high-sensitivity C-reactive protein; RC: Residual cholesterol; RCII: Residual cholesterol inflammatory index.

Values are presented as mean ± SD, median (IQR), or n (%), as appropriate. P-values were calculated using t-test, Mann-Whitney U test, or chi-square test as applicable. P-values < 0.05 were considered statistically significant.
