# Supplementary material for: Residual Cholesterol Inflammation Index as a Predictive Biomarker for Stroke Risk in Middle-Aged and Elderly Individuals: Insights from the China Health and Retirement Longitudinal Study
Source: Research Square preprint supplement (doi:10.21203/rs.3.rs-8788904/v1), 2026-02-16
Supplement: Supplementary file 8 [file 31ca8a1b3240cb4509e92a27.docx]

Table S8 Association between the RCII and stroke incidence according to glucose regulation state after excluding participants with any missing values.

| GMS | Characteristic | Crude,HR(95%CI) | Model1,HR(95%CI) | Model2,HR(95%CI) |
| --- | --- | --- | --- | --- |
| NGR | Quartile1 | Reference | Reference | Reference |
|  | Quartile2 | 1.213(0.778,1.891) | 1.165(0.746,1.818) | 1.059(0.675,1.662) |
|  | Quartile3 | 1.889(1.243,2.871) | 1.801(1.182,2.744) | 1.417(0.917,2.189) |
|  | Quartile4 | 2.378(1.556,3.634) | 2.237(1.461,3.424) | 1.656(1.054,2.602) |
|  | P for trend | 0.017 | 0.034 | 0.29 |
|  | Per 1SD increase | 1.125(1.021,1.240) | 1.113(1.008,1.230) | 1.060(0.951,1.182) |
| Pre-DM | Quartile1 | Reference | Reference | Reference |
|  | Quartile2 | 1.340(0.907,1.980) | 1.313(0.888,1.940) | 1.207(0.813,1.791) |
|  | Quartile3 | 1.552(1.066,2.261) | 1.528(1.047,2.228) | 1.221(0.825,1.807) |
|  | Quartile4 | 1.810(1.259,2.601) | 1.770(1.229,2.550) | 1.329(0.898,1.967) |
|  | P for trend | <0.001 | <0.001 | 0.011 |
|  | Per 1SD increase | 1.200(1.097,1.312) | 1.195(1.091,1.307) | 1.136(1.030,1.254) |
| DM | Quartile1 | Reference | Reference | Reference |
|  | Quartile2 | 1.513(0.641,3.570) | 1.581(0.669,3.737) | 1.452(0.609,3.463) |
|  | Quartile3 | 2.063(0.948,4.488) | 2.018(0.924,4.406) | 1.438(0.643,3.215) |
|  | Quartile4 | 2.260(1.068,4.782) | 2.216(1.044,4.706) | 1.385(0.623,3.080) |
|  | P for trend | 0.162 | 0.167 | 0.829 |
|  | Per 1SD increase | 1.121(0.955,1.316) | 1.122(0.953,1.322) | 1.021(0.849,1.226) |

Crude: unadjusted for any covariates;

Model 1: adjusted for age, gender, smoking status, drinking status, residence, education level and marital status;

Model 2: adjusted for variables included in Model 2 and SBP, DBP, BMI, hypertension, dyslipidemia, diabetes, liver disease and kidney disease.

Abbreviations: BMI, body mass index; SBP, systolic blood pressure; DBP, diastolic blood pressure; RCII: Residual cholesterol inflammatory index; GMS, glucose regulation state; NGR, normal glucose regulation; Pre-DM, prediabetes mellitus; DM, diabetes mellitus; HR, Hazard ratio; CI, confidence interval; SD, standard deviation.
