# Supplementary material for: Residual Cholesterol Inflammation Index as a Predictive Biomarker for Stroke Risk in Middle-Aged and Elderly Individuals: Insights from the China Health and Retirement Longitudinal Study
Source: Research Square preprint supplement (doi:10.21203/rs.3.rs-8788904/v1), 2026-02-16
Supplement: Supplementary file 9 [file 59a9f05ce6af3dd79867e5f1.docx]

Table S 12 Association between the RCII and stroke incidence according to age after excluding participants with not fasting.

| Age | Characteristic | Crude,HR(95%CI) | Model1,HR(95%CI) | Model2,HR(95%CI) |
| --- | --- | --- | --- | --- |
| Age 45-60 | Quartile1 | Reference | Reference | Reference |
|  | Quartile2 | 1.585(1.064,2.361) | 1.535(1.029,2.289) | 1.430(0.953,2.146) |
|  | Quartile3 | 1.839(1.244,2.718) | 1.766(1.193,2.615) | 1.331(0.881,2.010) |
|  | Quartile4 | 3.155(2.202,4.521) | 3.048(2.122,4.376) | 2.126(1.424,3.175) |
|  | P for trend | <0.001 | <0.001 | <0.001 |
|  | Per 1SD increase | 1.258(1.174,1.348) | 1.256(1.171,1.348) | 1.168(1.079,1.265) |
| Age ≥60 | Quartile1 | Reference | Reference | Reference |
|  | Quartile2 | 1.149(0.803,1.645) | 1.150(0.803,1.646) | 1.032(0.718,1.481) |
|  | Quartile3 | 1.499(1.074,2.094) | 1.502(1.074,2.102) | 1.169(0.826,1.654) |
|  | Quartile4 | 1.374(0.976,1.935) | 1.342(0.950,1.896) | 0.953(0.660,1.376) |
|  | P for trend | 0.014 | 0.02 | 0.385 |
|  | Per 1SD increase | 1.124(1.024,1.233) | 1.117(1.017,1.226) | 1.047(0.944,1.161) |

Crude: unadjusted for any covariates;

Model 1: adjusted for age, gender, smoking status, drinking status, residence, education level and marital status;

Model 2: adjusted for variables included in Model 2 and SBP, DBP, BMI, hypertension, dyslipidemia, diabetes, liver disease and kidney disease.

Abbreviations: BMI, body mass index; SBP, systolic blood pressure; DBP, diastolic blood pressure; RCII: Residual cholesterol inflammatory index; HR, Hazard ratio; CI, confidence interval; SD, standard deviation.
