# Supplementary material for: Residual Cholesterol Inflammation Index as a Predictive Biomarker for Stroke Risk in Middle-Aged and Elderly Individuals: Insights from the China Health and Retirement Longitudinal Study
Source: Research Square preprint supplement (doi:10.21203/rs.3.rs-8788904/v1), 2026-02-16
Supplement: Supplementary file 10 [file 64f877257a28540f97345524.docx]

Table 3 Association between the RCII and stroke incidence according to glucose regulation state

| GMS | Characteristic | Crude,HR(95%CI) | Model1,HR(95%CI) | Model2,HR(95%CI) |
| --- | --- | --- | --- | --- |
| NGR | Quartile1 | Reference | Reference | Reference |
|  | Quartile2 | 1.172(0.786,1.749) | 1.129(0.756,1.687) | 1.029(0.685,1.544) |
|  | Quartile3 | 1.652(1.129,2.418) | 1.566(1.067,2.298) | 1.203(0.809,1.788) |
|  | Quartile4 | 2.167(1.476,3.182) | 2.049(1.393,3.013) | 1.476(0.979,2.226) |
|  | P for trend | 0.006 | 0.011 | 0.189 |
|  | Per 1SD increase | 1.131(1.037,1.234) | 1.123(1.027,1.227) | 1.068(0.968,1.177) |
| Pre-DM | Quartile1 | Reference | Reference | Reference |
|  | Quartile2 | 1.314(0.918,1.882) | 1.297(0.905,1.857) | 1.178(0.819,1.694) |
|  | Quartile3 | 1.518(1.074,2.145) | 1.504(1.063,2.128) | 1.177(0.821,1.687) |
|  | Quartile4 | 1.912(1.372,2.664) | 1.892(1.355,2.641) | 1.377(0.963,1.969) |
|  | P for trend | <0.001 | <0.001 | <0.001 |
|  | Per 1SD increase | 1.234(1.142,1.333) | 1.235(1.143,1.336) | 1.172(1.076,1.275) |
| DM | Quartile1 | Reference | Reference | Reference |
|  | Quartile2 | 1.291(0.627,2.661) | 1.347(0.652,2.782) | 1.263(0.608,2.625) |
|  | Quartile3 | 1.702(0.886,3.273) | 1.669(0.866,3.216) | 1.284(0.653,2.525) |
|  | Quartile4 | 1.922(1.034,3.572) | 1.935(1.038,3.607) | 1.369(0.705,2.656) |
|  | P for trend | 0.027 | 0.026 | 0.269 |
|  | Per 1SD increase | 1.165(1.017,1.335) | 1.169(1.019,1.342) | 1.089(0.936,1.269) |

Crude: unadjusted for any covariates;

Model 1: adjusted for age, gender, smoking status, drinking status, residence, education level and marital status;

Model 2: adjusted for variables included in Model 2 and SBP, DBP, BMI, hypertension, dyslipidemia, diabetes, liver disease and kidney disease.

Abbreviations: BMI, body mass index; SBP, systolic blood pressure; DBP, diastolic blood pressure; RCII: Residual cholesterol inflammatory index; GMS, glucose regulation state; NGR, normal glucose regulation; Pre-DM, prediabetes mellitus; DM, diabetes mellitus; HR, Hazard ratio; CI, confidence interval; SD, standard deviation.
