# Supplementary material for: Residual Cholesterol Inflammation Index as a Predictive Biomarker for Stroke Risk in Middle-Aged and Elderly Individuals: Insights from the China Health and Retirement Longitudinal Study
Source: Research Square preprint supplement (doi:10.21203/rs.3.rs-8788904/v1), 2026-02-16
Supplement: Supplementary file 11 [file 67f2d9e07568dd944f6fed3c.docx]

| Table S16 Logistic regression analysis of the relationship between RCII and stroke incidence . | | | | | | |
| --- | --- | --- | --- | --- | --- | --- |
| RCII | Quartiles | | | | | Continuous |
| Quartile1 | Quartile2 | Quartile3 | Quartile4 | P for trend | Per 1SD increase |
| Crude,HR(95%CI) | Reference | 1.229(0.946,1.601) | 1.576(1.229,2.031) | 2.024(1.594,2.585) | <0.001 | 1.208(1.136,1.282) |
| Model1,HR(95%CI) | Reference | 1.211(0.931,1.578) | 1.522(1.184,1.963) | 1.596(1.537,2.502) | <0.001 | 1.198(1.125,1.272) |
| Model2,HR(95%CI) | Reference | 1.074(0.821,1.406) | 1.164(0.895,1.519) | 1.351(1.038,1.764) | <0.001 | 1.123(1.049,1.199) |

Crude: unadjusted for any covariates;

Model 1: adjusted for age, gender, smoking status, drinking status, residence, education level and marital status;

Model 2: adjusted for variables included in Model 2 and SBP, DBP, BMI, hypertension, dyslipidemia, diabetes, liver disease and kidney disease.

Abbreviations: BMI, body mass index; SBP, systolic blood pressure; DBP, diastolic blood pressure; RCII: Residual cholesterol inflammatory index; OR, odds ratio; CI, confidence interval; SD, standard deviation.
