# Supplementary material for: Residual Cholesterol Inflammation Index as a Predictive Biomarker for Stroke Risk in Middle-Aged and Elderly Individuals: Insights from the China Health and Retirement Longitudinal Study
Source: Research Square preprint supplement (doi:10.21203/rs.3.rs-8788904/v1), 2026-02-16
Supplement: Supplementary file 12 [file 6822f83b280cd4325a06217c.docx]

Table S14 Association between the RCII and stroke incidence according to glucose regulation state after excluding deceased participants.

| GMS | Characteristic | Crude,HR(95%CI) | Model1,HR(95%CI) | Model2,HR(95%CI) |
| --- | --- | --- | --- | --- |
| NGR | Quartile1 | Reference | Reference | Reference |
|  | Quartile2 | 1.204(0.796,1.820) | 1.156(0.763,1.750) | 1.014(0.666,1.544) |
|  | Quartile3 | 1.650(1.111,2.451) | 1.566(1.052,2.332) | 1.151(0.762,1.740) |
|  | Quartile4 | 2.346(1.578,3.486) | 2.213(1.486,3.297) | 1.538(1.006,2.352) |
|  | P for trend | 0.001 | 0.002 | 0.055 |
|  | Per 1SD increase | 1.154(1.059,1.259) | 1.146(1.049,1.252) | 1.099(0.998,1.212) |
| Pre-DM | Quartile1 | Reference | Reference | Reference |
|  | Quartile2 | 1.287(0.876,1.892) | 1.262(0.859,1.856) | 1.171(0.794,1.728) |
|  | Quartile3 | 1.556(1.074,2.254) | 1.550(1.069,2.247) | 1.259(0.856,1.850) |
|  | Quartile4 | 2.179(1.534,3.098) | 2.160(1.517,3.074) | 1.626(1.113,2.376) |
|  | P for trend | <0.001 | <0.001 | <0.001 |
|  | Per 1SD increase | 1.265(1.170,1.367) | 1.268(1.172,1.371) | 1.213(1.114,1.320) |
| DM | Quartile1 | Reference | Reference | Reference |
|  | Quartile2 | 1.457(0.672,3.158) | 1.524(0.702,3.309) | 1.387(0.634,3.035) |
|  | Quartile3 | 1.785(0.873,3.653) | 1.750(0.853,3.588) | 1.361(0.649,2.852) |
|  | Quartile4 | 2.147(1.095,4.208) | 2.209(1.125,4.341) | 1.538(0.748,3.165) |
|  | P for trend | 0.012 | 0.01 | 0.148 |
|  | Per 1SD increase | 1.194(1.039,1.372) | 1.202(1.045,1.383) | 1.121(0.961,1.308) |

Crude: unadjusted for any covariates;

Model 1: adjusted for age, gender, smoking status, drinking status, residence, education level and marital status;

Model 2: adjusted for variables included in Model 2 and SBP, DBP, BMI, hypertension, dyslipidemia, diabetes, liver disease and kidney disease.

Abbreviations: BMI, body mass index; SBP, systolic blood pressure; DBP, diastolic blood pressure; RCII: Residual cholesterol inflammatory index; GMS, glucose regulation state; NGR, normal glucose regulation; Pre-DM, prediabetes mellitus; DM, diabetes mellitus; HR, Hazard ratio; CI, confidence interval; SD, standard deviation.
