# Supplementary material for: Residual Cholesterol Inflammation Index as a Predictive Biomarker for Stroke Risk in Middle-Aged and Elderly Individuals: Insights from the China Health and Retirement Longitudinal Study
Source: Research Square preprint supplement (doi:10.21203/rs.3.rs-8788904/v1), 2026-02-16
Supplement: Supplementary file 13 [file 6f18a6f31580281aacdd463a.docx]

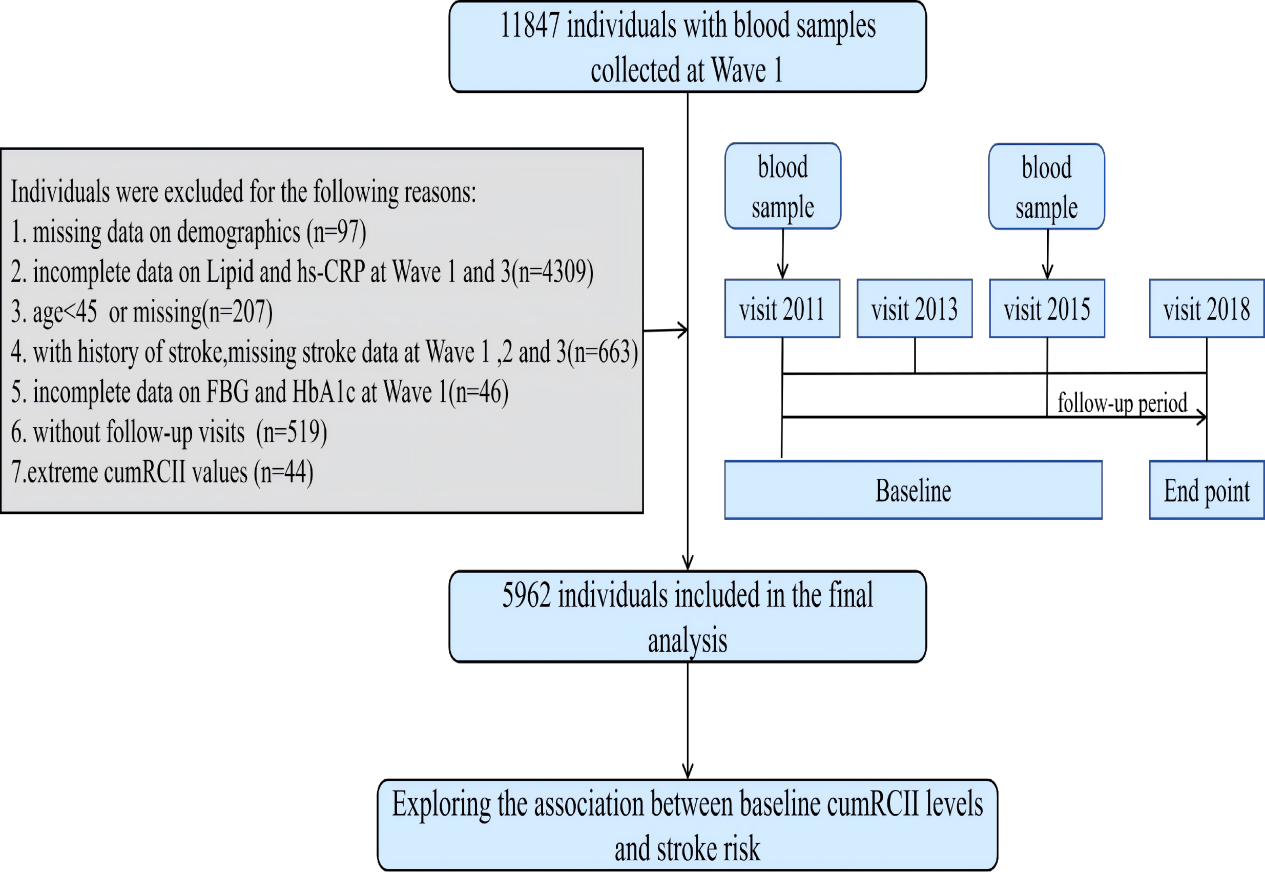


Figure. S1 Flowchart of the study population.

Abbreviations: cumRCII, cumulative remnant cholesterol inflammatory index; hs-CRP, high-sensitivity C-reactive protein; HbA1c, glycosylated hemoglobin A1c; FBG, fasting blood glucose.
