# Supplementary material for: Residual Cholesterol Inflammation Index as a Predictive Biomarker for Stroke Risk in Middle-Aged and Elderly Individuals: Insights from the China Health and Retirement Longitudinal Study
Source: Research Square preprint supplement (doi:10.21203/rs.3.rs-8788904/v1), 2026-02-16
Supplement: Supplementary file 14 [file 718b499300925c49396a0ab0.docx]

Table S6 Subgroup and interaction analyses of the association between RCII and stroke risk.

| Variable | Count | Percent | HR(95%CI) | P value | P for interaction |
| --- | --- | --- | --- | --- | --- |
| Overall | 7940 | 100 | 1.267(1.179,1.362)) | <0.001 |  |
|  |  |  |  |  |  |
| Age |  |  |  |  | 0.001 |
| 45-60 | 4721 | 59.5% | 1.433(1.288,1.593) | <0.001 |  |
| ≥60 | 3219 | 40.5% | 1.119(1.013,1.237) | 0.027 |  |
|  |  |  |  |  |  |
| Gender |  |  |  |  | 0.527 |
| Male | 3616 | 45.5% | 1.236(1.112,1.373) | <0.001 |  |
| Female | 4324 | 54.5% | 1.295(1.172,1.431)) | <0.001 |  |
|  |  |  |  |  |  |
| Smoking status |  |  |  |  | 0.545 |
| No | 5573 | 70.2% | 1.286(1.180,1.402) | <0.001 |  |
| Yes | 2367 | 29.8% | 1.227(1.075,1.401)) | 0.003 |  |
|  |  |  |  |  |  |
| Drinking status |  |  |  |  | 0.498 |
| No | 5508 | 69.4% | 1.246(1.142,1.359) | <0.001 |  |
| Yes | 2432 | 30.6% | 1.316(1.155,1.499) | <0.001 |  |
|  |  |  |  |  |  |
| Residence |  |  |  |  | 0.313 |
| Urban | 1252 | 15.8% | 1.163(0.974,1.389) | 0.095 |  |
| Rural | 6688 | 84.2% | 1.287(1.188,1.393) | <0.001 |  |
|  |  |  |  |  |  |
| Dyslipidemia |  |  |  |  | 0.862 |
| No | 4120 | 51.9% | 1.193(1.061,1.342) | 0.003 |  |
| Yes | 3820 | 48.1% | 1.178(1.061,1.308) | 0.002 |  |
|  |  |  |  |  |  |
| Hypertension |  |  |  |  | 0.658 |
| No | 4932 | 62.1% | 1.211(1.081,1.356) | 0.001 |  |
| Yes | 3008 | 37.9% | 1.169(1.063,1.287) | 0.001 |  |
|  |  |  |  |  |  |
| DM |  |  |  |  | 0.848 |
| No | 6673 | 84% | 1.256(1.158,1.362) | <0.001 |  |
| Yes | 1267 | 16% | 1.231(1.036,1.463) | 0.018 |  |
|  |  |  |  |  |  |
| Kidney disease |  |  |  |  | 0.661 |
| No | 7493 | 94.4% | 1.260(1.169,1.358) | <0.001 |  |
| Yes | 447 | 5.6% | 1.369(1.034,1.812) | 0.028 |  |
|  |  |  |  |  |  |
| Liver disease |  |  |  |  | 0.557 |
| No | 7675 | 96.7% | 1.274(1.183,1.371) | <0.001 |  |
| Yes | 265 | 3.3% | 1.146(0.807,1.627) | 0.446 |  |

Abbreviations: RCII: Residual cholesterol inflammatory index; DM, diabetes mellitus; HR, Hazard ratio; CI, confidence interval.
