# Supplementary material for: Residual Cholesterol Inflammation Index as a Predictive Biomarker for Stroke Risk in Middle-Aged and Elderly Individuals: Insights from the China Health and Retirement Longitudinal Study
Source: Research Square preprint supplement (doi:10.21203/rs.3.rs-8788904/v1), 2026-02-16
Supplement: Supplementary file 15 [file 74d5b8fbaa9ac8495b780120.docx]

Table S21 Poisson regression analysis of the relationship between RCII and stroke incidence according to age

| Age | Characteristic | Crude,RR(95%CI) | Model1,RR(95%CI) | Model2,RR(95%CI) |
| --- | --- | --- | --- | --- |
| Age 45-60 | Quartile1 | Reference | Reference | Reference |
|  | Quartile2 | 1.416(0.974,2.060) | 1.384(0.951,2.015) | 1.259(0.855,1.856) |
|  | Quartile3 | 1.616(1.119,2.333) | 1.561(1.080,2.258) | 1.218(0.825,1.799) |
|  | Quartile4 | 2.789(1.998,3.894) | 2.698(1.927,3.777) | 1.919(1.303,2.825) |
|  | P for trend | <0.001 | <0.001 | <0.001 |
|  | Per 1SD increase | 1.252(1.183,1.325) | 1.252(1.182,1.326) | 1.190(1.105,1.282) |
| Age ≥60 | Quartile1 | Reference | Reference | Reference |
|  | Quartile2 | 1.063(0.765,1.476) | 1.054(0.758,1.465) | 0.957(0.689,1.330) |
|  | Quartile3 | 1.412(1.043,1.911) | 1.398(1.032,1.893) | 1.135(0.833,1.547) |
|  | Quartile4 | 1.293(0.950,1.760) | 1.245(0.910,1.704) | 0.932(0.673,1.291) |
|  | P for trend | 0.032 | 0.052 | 0.645 |
|  | Per 1SD increase | 1.093(1.008,1.186) | 1.087(0.999,1.183) | 1.022(0.931,1.123) |

Crude: unadjusted for any covariates;

Model 1: adjusted for age, gender, smoking status, drinking status, residence, education level and marital status;

Model 2: adjusted for variables included in Model 2 and SBP, DBP, BMI, hypertension, dyslipidemia, diabetes, liver disease and kidney disease.

Abbreviations: BMI, body mass index; SBP, systolic blood pressure; DBP, diastolic blood pressure; RCII: Residual cholesterol inflammatory index; RR, relative ratio; CI, confidence interval; SD, standard deviation.
