# Supplementary material for: Residual Cholesterol Inflammation Index as a Predictive Biomarker for Stroke Risk in Middle-Aged and Elderly Individuals: Insights from the China Health and Retirement Longitudinal Study
Source: Research Square preprint supplement (doi:10.21203/rs.3.rs-8788904/v1), 2026-02-16
Supplement: Supplementary file 17 [file 7963790a7b76d6fdc1ef5247.docx]

Table S9 Association between the RCII and stroke incidence according to age after excluding participants with any missing values.

| Age | Characteristic | Crude,HR(95%CI) | Model1,HR(95%CI) | Model2,HR(95%CI) |
| --- | --- | --- | --- | --- |
| Age 45-60 | Quartile1 | Reference | Reference | Reference |
|  | Quartile2 | 1.571(1.029,2.399) | 1.531(1.002,2.341) | 1.500(0.975,2.308) |
|  | Quartile3 | 1.822(1.200,2.765) | 1.750(1.151,2.660) | 1.437(0.928,2.226) |
|  | Quartile4 | 3.089(2.103,4.536) | 2.984(2.027,4.392) | 2.346(1.529,3.598) |
|  | P for trend | <0.001 | <0.001 | 0.001 |
|  | Per 1SD increase | 1.230(1.139,1.329) | 1.230(1.137,1.332) | 1.153(1.057,1.258) |
| Age ≥60 | Quartile1 | Reference | Reference | Reference |
|  | Quartile2 | 1.099(0.752,1.605) | 1.098(0.751,1.605) | 1.003(0.684,1.470) |
|  | Quartile3 | 1.529(1.080,2.164) | 1.537(1.085,2.177) | 1.229(0.858,1.759) |
|  | Quartile4 | 1.367(0.958,1.949) | 1.327(0.929,1.897) | 0.980(0.672,1.429) |
|  | P for trend | 0.102 | 0.133 | 0.788 |
|  | Per 1SD increase | 1.090(0.983,1.208) | 1.083(0.976,1.202) | 1.016(0.905,1.140) |

Crude: unadjusted for any covariates;

Model 1: adjusted for age, gender, smoking status, drinking status, residence, education level and marital status;

Model 2: adjusted for variables included in Model 2 and SBP, DBP, BMI, hypertension, dyslipidemia, diabetes, liver disease and kidney disease.

Abbreviations: BMI, body mass index; SBP, systolic blood pressure; DBP, diastolic blood pressure; RCII: Residual cholesterol inflammatory index; HR, Hazard ratio; CI, confidence interval; SD, standard deviation.
