# Supplementary material for: Residual Cholesterol Inflammation Index as a Predictive Biomarker for Stroke Risk in Middle-Aged and Elderly Individuals: Insights from the China Health and Retirement Longitudinal Study
Source: Research Square preprint supplement (doi:10.21203/rs.3.rs-8788904/v1), 2026-02-16
Supplement: Supplementary file 18 [file 7d31a40ee3088de0924a15d4.docx]

| Table S10 Association between the RCII and stroke incidence after excluding participants with not fasting. | | | | | | |
| --- | --- | --- | --- | --- | --- | --- |
| RCII | Quartiles | | | | | Continuous |
| Quartile1 | Quartile2 | Quartile3 | Quartile4 | P for trend | Per 1SD increase |
| Crude,HR(95%CI) | Reference | 1.339(1.027,1.748) | 1.679(1.302,2.164) | 2.114(1.655,2.700) | <0.001 | 1.197(1.133,1.265) |
| Model1,HR(95%CI) | Reference | 1.317(1.009,1.718) | 1.626(1.261,2.098) | 2.044(1.598,2.615) | <0.001 | 1.189(1.124,1.257) |
| Model2,HR(95%CI) | Reference | 1.177(0.899,1.540) | 1.213(0.931,1.581) | 1.393(1.067,1.818) | <0.001 | 1.110(1.044,1.182) |

Crude: unadjusted for any covariates;

Model 1: adjusted for age, gender, smoking status, drinking status, residence, education level and marital status;

Model 2: adjusted for variables included in Model 2 and SBP, DBP, BMI, hypertension, dyslipidemia, diabetes, liver disease and kidney disease.

Abbreviations: BMI, body mass index; SBP, systolic blood pressure; DBP, diastolic blood pressure; RCII: Residual cholesterol inflammatory index; HR, Hazard ratio; CI, confidence interval; SD, standard deviation.
