# Supplementary material for: Residual Cholesterol Inflammation Index as a Predictive Biomarker for Stroke Risk in Middle-Aged and Elderly Individuals: Insights from the China Health and Retirement Longitudinal Study
Source: Research Square preprint supplement (doi:10.21203/rs.3.rs-8788904/v1), 2026-02-16
Supplement: Supplementary file 19 [file a3e1a9358ad4b8dcc1510330.docx]

| Table S7 Association between the RCII and stroke incidence after excluding participants with any missing values. | | | | | | |
| --- | --- | --- | --- | --- | --- | --- |
| RCII | Quartiles | | | | | Continuous |
| Quartile1 | Quartile2 | Quartile3 | Quartile4 | P for trend | Per 1SD increase |
| Crude,HR(95%CI) | Reference | 1.303(0.983,1.727) | 1.706(1.307,2.228) | 2.070(1.598,2.680) | <0.001 | 1.165(1.095,1.239) |
| Model1,HR(95%CI) | Reference | 1.277(0.963,1.693) | 1.645(1.259,2.150) | 1.982(1.529,2.570) | <0.001 | 1.153(1.083,1.227) |
| Model2,HR(95%CI) | Reference | 1.172(0.882,1.557) | 1.290(0.977,1.703) | 1.453(1.098,1.923) | 0.02 | 1.085(1.013,1.162) |

Crude: unadjusted for any covariates

Model 1: adjusted for age, gender, smoking status, drinking status, residence, education level and marital status;

Model 2: adjusted for variables included in Model 2 and SBP, DBP, BMI, hypertension, dyslipidemia, diabetes, liver disease and kidney disease.

Abbreviations: BMI, body mass index; SBP, systolic blood pressure; DBP, diastolic blood pressure; RCII: Residual cholesterol inflammatory index; HR, Hazard ratio; CI, confidence interval; SD, standard deviation.
