# Supplementary material for: Residual Cholesterol Inflammation Index as a Predictive Biomarker for Stroke Risk in Middle-Aged and Elderly Individuals: Insights from the China Health and Retirement Longitudinal Study
Source: Research Square preprint supplement (doi:10.21203/rs.3.rs-8788904/v1), 2026-02-16
Supplement: Supplementary file 20 [file a4d9fc702425989d9286d48b.docx]

Table S1 Baseline characteristics of individuals without any missing values.

| Characteristic | Overall | RCII quartiles | | | | p |
| --- | --- | --- | --- | --- | --- | --- |
| Q1 | Q2 | Q3 | Q4 |
| No. of subjects | 6629 | 1661 | 1658 | 1656 | 1654 |  |
| Gender (%) |  |  |  |  |  | 0.046 |
| Male | 2989 (45.1) | 741 (44.6) | 766 (46.2) | 779 (47.0) | 703 (42.5) |  |
| Female | 3640 (54.9) | 920 (55.4) | 892 (53.8) | 877 (53.0) | 951 (57.5) |  |
| Age,year(mean (SD)) | 58.35 (8.65) | 57.73 (8.84) | 58.06 (8.42) | 58.86 (8.67) | 58.77 (8.61) | <0.001 |
| Marital status (%) |  |  |  |  |  | 0.179 |
| Marryed | 5692 (85.9) | 1411 (84.9) | 1421 (85.7) | 1448 (87.4) | 1412 (85.4) |  |
| Other | 937 (14.1) | 250 (15.1) | 237 (14.3) | 208 (12.6) | 242 (14.6) |  |
| Education level (%) |  |  |  |  |  | 0.294 |
| Elementary school or below | 4649 (70.1) | 1162 (70.0) | 1176 (70.9) | 1160 (70.0) | 1151 (69.6) |  |
| Middle school | 1806 (27.2) | 467 (28.1) | 440 (26.5) | 451 (27.2) | 448 (27.1) |  |
| College or above | 174 (2.6) | 32 (1.9) | 42 (2.5) | 45 (2.7) | 55 (3.3) |  |
| Residence (%) |  |  |  |  |  | <0.001 |
| Rural | 5626 (84.9) | 1464 (88.1) | 1433 (86.4) | 1385 (83.6) | 1344 (81.3) |  |
| Urban | 1003 (15.1) | 197 (11.9) | 225 (13.6) | 271 (16.4) | 310 (18.7) |  |
| BMI,kg/m2 (mean (SD)) | 24.01 (30.58) | 22.10 (3.26) | 23.39 (11.79) | 25.58 (59.74) | 24.96 (4.26) | 0.004 |
| SBP,mmHg (mean (SD)) | 128.48 (20.92) | 124.53(19.87) | 126.60(20.72) | 130.81 (21.02) | 132.01 (21.19) | <0.001 |
| DBP,mmHg (mean (SD)) | 75.00 (12.08) | 72.59 (11.72) | 74.11 (12.06) | 76.10 (11.99) | 77.21 (12.02) | <0.001 |
| Smoking status (%) |  |  |  |  |  | 0.011 |
| Never | 4116 (62.1) | 1062 (63.9) | 1019 (61.5) | 997 (60.2) | 1038 (62.8) |  |
| Former | 531 (8.0) | 102 (6.1) | 130 (7.8) | 147 (8.9) | 152 (9.2) |  |
| Current | 1982 (29.9) | 497 (29.9) | 509 (30.7) | 512 (30.9) | 464 (28.1) |  |
| Drinking status (%) | 2023 (30.5) | 523 (31.5) | 522 (31.5) | 494 (29.8) | 484 (29.3) | 0.012 |
| Never | 4084 (61.6) | 1043 (62.8) | 994 (60.0) | 1018 (61.5) | 1029 (62.2) |  |
| Former | 522 (7.9) | 95 (5.7) | 142 (8.6) | 144 (8.7) | 141 (8.5) |  |
| Current | 2023 (30.5) | 523 (31.5) | 522 (31.5) | 494 (29.8) | 484 (29.3) |  |
| Dyslipidemia (%) | 3153 (47.6) | 351 (21.1) | 644 (38.8) | 936 (56.5) | 1222 (73.9) | <0.001 |
| Hypertension (%) | 2579 (38.9) | 471 (28.4) | 552 (33.3) | 735 (44.4) | 821 (49.6) | <0.001 |
| Diabetes (%) | 1054 (15.9) | 151 (9.1) | 197 (11.9) | 294 (17.8) | 412 (24.9) | <0.001 |
| Kidney disease (%) | 366 (5.5) | 88 (5.3) | 101 (6.1) | 87 (5.3) | 90 (5.4) | 0.696 |
| Liver diseasee (%) | 216 (3.3) | 63 (3.8) | 45 (2.7) | 58 (3.5) | 50 (3.0) | 0.3 |
| Lipid-lowering treatment (%) | 321 (4.8) | 47 (2.8) | 56 (3.4) | 89 (5.4) | 129 (7.8) | <0.001 |
| Antihypertensive treatment (%) | 1179 (17.8) | 178 (10.7) | 236 (14.2) | 351 (21.2) | 414 (25.0) | <0.001 |
| Hypoglycemic treatment(%) | 235 (3.5) | 37 (2.2) | 28 (1.7) | 72 (4.3) | 98 (5.9) | <0.001 |
| HbA1c,%(mean (SD)) | 5.26 (0.78) | 5.13 (0.59) | 5.16 (0.59) | 5.30 (0.82) | 5.44 (0.99) | <0.001 |
| FBG (mean (SD)) | 109.20 (34.29) | 101.84(21.02) | 104.79(26.74) | 110.27 (33.36) | 119.92 (47.43) | <0.001 |
| TG,mg/dl (mean (SD)) | 130.47 (93.95) | 76.60 (28.64) | 108.17(44.60) | 136.67 (65.69) | 200.72 (140.93) | <0.001 |
| TC,mg/dl (mean (SD)) | 193.64 (38.09) | 185.85(34.75) | 190.73(35.24) | 196.55 (37.08) | 201.47 (42.95) | <0.001 |
| HDL-c,mg/dl (mean (SD)) | 51.54 (15.21) | 60.52 (15.01) | 53.20 (13.60) | 49.09 (13.38) | 43.31 (13.37) | <0.001 |
| LDL-c,mg/dl (mean (SD)) | 116.75 (34.65) | 115.91(30.71) | 117.55(32.74) | 120.14 (34.24) | 113.40 (39.91) | <0.001 |
| hs-CRP,mg/l (mean (SD)) | 2.14 (4.63) | 0.60 (0.81) | 0.84 (0.59) | 1.58 (1.61) | 5.54 (8.15) | <0.001 |
| RC (mean (SD)) | 25.35 (23.98) | 9.42 (7.92) | 19.97 (10.43) | 27.32 (15.53) | 44.77 (35.04) | <0.001 |
| RCII (mean (SD)) | 5.18 (9.79) | 0.35 (0.50) | 1.28 (0.33) | 3.18 (0.88) | 15.93 (15.01) | <0.001 |
| stroke (%) | 508 (7.7) | 87 ( 5.2) | 109 (6.6) | 142 (8.6) | 170 (10.3) | <0.001 |

Abbreviations: BMI, body mass index; SBP, systolic blood pressure; DBP, diastolic blood pressure; HbA1c, glycosylated hemoglobin A1c; FBG, fasting blood glucose; TG, triglyceride; TC,total cholesterol; HDL-c, high-density lipoprotein cholesterol; LDL-c, low-density lipoprotein cholesterol; hs-CRP: high-sensitivity C-reactive protein; RC: Residual cholesterol; RCII: Residual cholesterol inflammatory index.

Values are presented as mean ± SD, median (IQR), or n (%), as appropriate. P-values were calculated using t-test, Mann-Whitney U test, or chi-square test as applicable. P-values < 0.05 were considered statistically significant.
