# Supplementary material for: Residual Cholesterol Inflammation Index as a Predictive Biomarker for Stroke Risk in Middle-Aged and Elderly Individuals: Insights from the China Health and Retirement Longitudinal Study
Source: Research Square preprint supplement (doi:10.21203/rs.3.rs-8788904/v1), 2026-02-16
Supplement: Supplementary file 21 [file bc48663dd199b67f6a1a5ecf.docx]

Table S4 Baseline Characteristics by Stroke Status

| Characteristic | Overall | Non-stroke | stroke | p |
| --- | --- | --- | --- | --- |
| No. of subjects | 7940 | 7329 | 611 |  |
| Gender (%) |  |  |  | 0.229 |
| Male | 3616 (45.5) | 3323 (45.3) | 293 (48.0) |  |
| Female | 4324 (54.5) | 4006 (54.7) | 318 (52.0) |  |
| Age,year(mean (SD)) | 58.23 (8.71) | 58.04 (8.72) | 60.43 (8.32) | <0.001 |
| Marital status (%) |  |  |  | 0.03 |
| Marryed | 6743 (84.9) | 6243 (85.2) | 500 (81.8) |  |
| Other | 1197 (15.1) | 1086 (14.8) | 111 (18.2) |  |
| Education level (%) |  |  |  | 0.22 |
| Elementary school or below | 5523 (69.6) | 5081 (69.3) | 442 (72.3) |  |
| Middle school | 2188 (27.6) | 2038 (27.8) | 150 (24.5) |  |
| College or above | 229 (2.9) | 210 (2.9) | 19 (3.1) |  |
| Residence (%) |  |  |  | 0.29 |
| Rural | 6688 (84.2) | 6183 (84.4) | 505 (82.7) |  |
| Urban | 1252 (15.8) | 1146 (15.6) | 106 (17.3) |  |
| BMI,kg/m2 (median (IQR)) | 23.22[20.95,25.84] | 23.17[20.91,25.75] | 23.96[21.41,26.67] | <0.001 |
| SBP,mmHg (mean (SD)) | 128.19 (20.77) | 127.45 (20.37) | 137.10 (23.28) | <0.001 |
| DBP,mmHg (mean (SD)) | 74.88 (12.06) | 74.53 (11.94) | 79.16 (12.69) | <0.001 |
| Smoking status (%) |  |  |  | 0.001 |
| Never | 4944 (62.3) | 4589 (62.6) | 355 (58.1) |  |
| Former | 629 (7.9) | 557 (7.6) | 72 (11.8) |  |
| Current | 2367 (29.8) | 2183 (29.8) | 184 (30.1) |  |
| Drinking status (%) |  |  |  | 0.008 |
| Never | 4882 (61.5) | 4529 (61.8) | 353 (57.8) |  |
| Former | 626 ( 7.9) | 559 (7.6) | 67 (11.0) |  |
| Current | 2432 (30.6) | 2241 ( 30.6) | 191 (31.3) |  |
| Dyslipidemia (%) | 3820 (48.1) | 3449 (47.1) | 371 (60.7) | <0.001 |
| Hypertension (%) | 3008 (37.9) | 2637 (36.0) | 371 (60.7) | <0.001 |
| Diabetes (%) | 1267 (16.0) | 1140 (15.6) | 127 (20.8) | 0.001 |
| Kidney disease (%) | 447 (5.6) | 403 (5.5) | 44 (7.2) | 0.096 |
| Liver diseasee (%) | 265 (3.3) | 240 (3.3) | 25 (4.1) | 0.336 |
| Lipid-lowering treatment (%) | 395 (5.0) | 337 (4.6) | 58 (9.5) | <0.001 |
| Antihypertensive treatment (%) | 1457 (18.4) | 1242 (16.9) | 215 (35.2) | <0.001 |
| Hypoglycemic treatment(%) | 285 ( 3.6) | 242 ( 3.3) | 43 ( 7.0) | <0.001 |
| HbA1c,%(mean (SD)) | 5.25 (0.78) | 5.25 (0.77) | 5.36 (0.89) | 0.001 |
| FBG (median (IQR)) | 102.24[94.32,112.68] | 102.06[94.14,112.32] | 104.58[95.85,116.64] | <0.001 |
| TG,mg/dl (median (IQR)) | 105.32[75.22,153.99] | 104.43[74.34,152.22] | 120.36[84.96,171.69] | <0.001 |
| TC,mg/dl (median (IQR)) | 190.59[167.40,214.95] | 190.21[167.01,214.56] | 194.46[168.75,219.98] | 0.023 |
| HDL-c,mg/dl (median (IQR)) | 49.48[40.59,59.92] | 49.87[40.59,60.31] | 47.17[39.05,56.44] | <0.001 |
| LDL-c,mg/dl (median (IQR)) | 114.43[93.56,137.24] | 114.05[93.94,136.86] | 116.37[93.36,140.34] | 0.170 |
| hs-CRP,mg/l (median (IQR)) | 0.98[0.53,1.99] | 0.96[0.53,1.96] | 1.22[0.62,2.56] | 0.001 |
| RC (median (IQR)) | 19.72[11.21,31.70] | 19.33[11.21,31.31] | 22.81[13.53,36.53] | <0.001 |
| RCII (median (IQR)) | 1.94[0.79,5.07] | 1.88[0.76,4.88] | 2.94[1.11,7.24] | <0.001 |

Abbreviations: BMI, body mass index; SBP, systolic blood pressure; DBP, diastolic blood pressure; HbA1c, glycosylated hemoglobin A1c; FBG, fasting blood glucose; TG, triglyceride; TC,total cholesterol; HDL-c, high-density lipoprotein cholesterol; LDL-c, low-density lipoprotein cholesterol; hs-CRP: high-sensitivity C-reactive protein; RC: Residual cholesterol; Residual cholesterol inflammatory index.

Values are presented as mean ± SD, median (IQR), or n (%), as appropriate. P-values were calculated using t-test, Mann-Whitney U test, or chi-square test as applicable. P-values < 0.05 were considered statistically significant.
