# Supplementary material for: Residual Cholesterol Inflammation Index as a Predictive Biomarker for Stroke Risk in Middle-Aged and Elderly Individuals: Insights from the China Health and Retirement Longitudinal Study
Source: Research Square preprint supplement (doi:10.21203/rs.3.rs-8788904/v1), 2026-02-16
Supplement: Supplementary file 22 [file bdcf821b13dd7e396afc56b3.docx]

| Table S19 Poisson regression analysis of the relationship between RCII and stroke incidence. | | | | | | |
| --- | --- | --- | --- | --- | --- | --- |
| RCII | Quartiles | | | | | Continuous |
| Quartile1 | Quartile2 | Quartile3 | Quartile4 | P for trend | Per 1SD increase |
| Crude,RR(95%CI) | Reference | 1.214(0.948,1.555) | 1.529(1.209,1.933) | 1.918(1.532,2.399) | <0.001 | 1.180(1.126,1.236) |
| Model1,RR(95%CI) | Reference | 1.197(0.935,1.531) | 1.477(1.168,1.868) | 1.851(1.476,2.321) | <0.001 | 1.169(1.114,1.227) |
| Model2,RR(95%CI) | Reference | 1.070(0.834,1.373) | 1.153(0.906,1.468) | 1.315(1.029,1.679) | 0.001 | 1.103(1.044,1.166) |

Crude: unadjusted for any covariates;

Model 1: adjusted for age, gender, smoking status, drinking status, residence, education level and marital status;

Model 2: adjusted for variables included in Model 2 and SBP, DBP, BMI, hypertension, dyslipidemia, diabetes, liver disease and kidney disease.

Abbreviations: BMI, body mass index; SBP, systolic blood pressure; DBP, diastolic blood pressure; RCII: Residual cholesterol inflammatory index; RR, relative ratio; CI, confidence interval; SD, standard deviation.
