# Supplementary material for: Residual Cholesterol Inflammation Index as a Predictive Biomarker for Stroke Risk in Middle-Aged and Elderly Individuals: Insights from the China Health and Retirement Longitudinal Study
Source: Research Square preprint supplement (doi:10.21203/rs.3.rs-8788904/v1), 2026-02-16
Supplement: Supplementary file 23 [file c9197a19d9ade506d1d45f1e.docx]

Table S20 Poisson regression analysis of the relationship between RCII and stroke incidence according to glucose regulation state.

| GMS | Characteristic | Crude,RR(95%CI) | Model1,RR(95%CI) | Model2,RR(95%CI) |
| --- | --- | --- | --- | --- |
| NGR | Quartile1 | Reference | Reference | Reference |
|  | Quartile2 | 1.142(0.773,1.687) | 1.113(0.752,1.647) | 0.978(0.655,1.461) |
|  | Quartile3 | 1.554(1.074,2.498) | 1.471(1.012,2.139) | 1.136(0.766,1.685) |
|  | Quartile4 | 2.074(1.432,3.003) | 1.963(1.350,2.854) | 1.399(0.929,2.108) |
|  | P for trend | <0.001 | 0.001 | 0.066 |
|  | Per 1SD increase | 1.139(1.062,1.221) | 1.128(1.048,1.213) | 1.078(0.995,1.168) |
| Pre-DM | Quartile1 | Reference | Reference | Reference |
|  | Quartile2 | 1.222(0.864,1.729) | 1.218(0.860,1.724) | 1.116(0.782,1.592) |
|  | Quartile3 | 1.454(1.041,2.029) | 1.441(1.031,2.015) | 1.173(0.819,1.679) |
|  | Quartile4 | 1.707(1.240,2.349) | 1.686(1.220,2.329) | 1.265(0.874,1.829) |
|  | P for trend | <0.001 | <0.001 | 0.006 |
|  | Per 1SD increase | 1.187(1.109,1.271) | 1.180(1.099,1.267) | 1.125(1.035,1.222) |
| DM | Quartile1 | Reference | Reference | Reference |
|  | Quartile2 | 1.204(0.598,2.425) | 1.228(0.610,2.471) | 1.146(0.553,2.375) |
|  | Quartile3 | 1.633(0.869,3.070) | 1.594(0.847,2.999) | 1.264(0.656,2.436) |
|  | Quartile4 | 1.829(1.005,3.330) | 1.868(1.021,3.418) | 1.371(0.707,2.659) |
|  | P for trend | 0.008 | 0.006 | 0.124 |
|  | Per 1SD increase | 1.181(1.045,1.335) | 1.195(1.052,1.357) | 1.128(0.968,1.314) |

Crude: unadjusted for any covariates;

Model 1: adjusted for age, gender, smoking status, drinking status, residence, education level and marital status;

Model 2: adjusted for variables included in Model 2 and SBP, DBP, BMI, hypertension, dyslipidemia, diabetes, liver disease and kidney disease.

Abbreviations: BMI, body mass index; SBP, systolic blood pressure; DBP, diastolic blood pressure; RCII: Residual cholesterol inflammatory index; GMS, glucose regulation state; NGR, normal glucose regulation; Pre-DM, prediabetes mellitus; DM, diabetes mellitus; RR, relative ratio; CI, confidence interval; SD, standard deviation.
