# Supplementary material for: Residual Cholesterol Inflammation Index as a Predictive Biomarker for Stroke Risk in Middle-Aged and Elderly Individuals: Insights from the China Health and Retirement Longitudinal Study
Source: Research Square preprint supplement (doi:10.21203/rs.3.rs-8788904/v1), 2026-02-16
Supplement: Supplementary file 24 [file cf4aa8321b1fa0e53fef60e4.docx]

| Table 2 Association between the RCII and stroke incidence | | | | | | |
| --- | --- | --- | --- | --- | --- | --- |
| RCII | Quartiles | | | | | Continuous |
| Quartile1 | Quartile2 | Quartile3 | Quartile4 | P for trend | Per 1SD increase |
| Crude,HR(95%CI) | Reference | 1.262(0.978,1.628) | 1.582(1.241,2.016) | 2.035(1.613,2.568) | <0.001 | 1.189(1.127,1.255) |
| Model1,HR(95%CI) | Reference | 1.241(0.962,1.602) | 1.530(1.199,1.952) | 1.966(1.557,2.484) | <0.001 | 1.181(1.119,1.247) |
| Model2,HR(95%CI) | Reference | 1.122(0.868,1.451) | 1.170(0.909,1.506) | 1.386(1.076,1.785) | <0.001 | 1.110(1.045,1.179) |

Crude: unadjusted for any covariates;

Model 1: adjusted for age, gender, smoking status, drinking status, residence, education level and marital status;

Model 2: adjusted for variables included in Model 2 and SBP, DBP, BMI, hypertension, dyslipidemia, diabetes, liver disease and kidney disease.

Abbreviations: BMI, body mass index; SBP, systolic blood pressure; DBP, diastolic blood pressure; RCII: Residual cholesterol inflammatory index; HR, Hazard ratio; CI, confidence interval; SD, standard deviation.
