# Supplementary material for: Residual Cholesterol Inflammation Index as a Predictive Biomarker for Stroke Risk in Middle-Aged and Elderly Individuals: Insights from the China Health and Retirement Longitudinal Study
Source: Research Square preprint supplement (doi:10.21203/rs.3.rs-8788904/v1), 2026-02-16
Supplement: Supplementary file 26 [file dbd2bc7b0187054882765aca.docx]

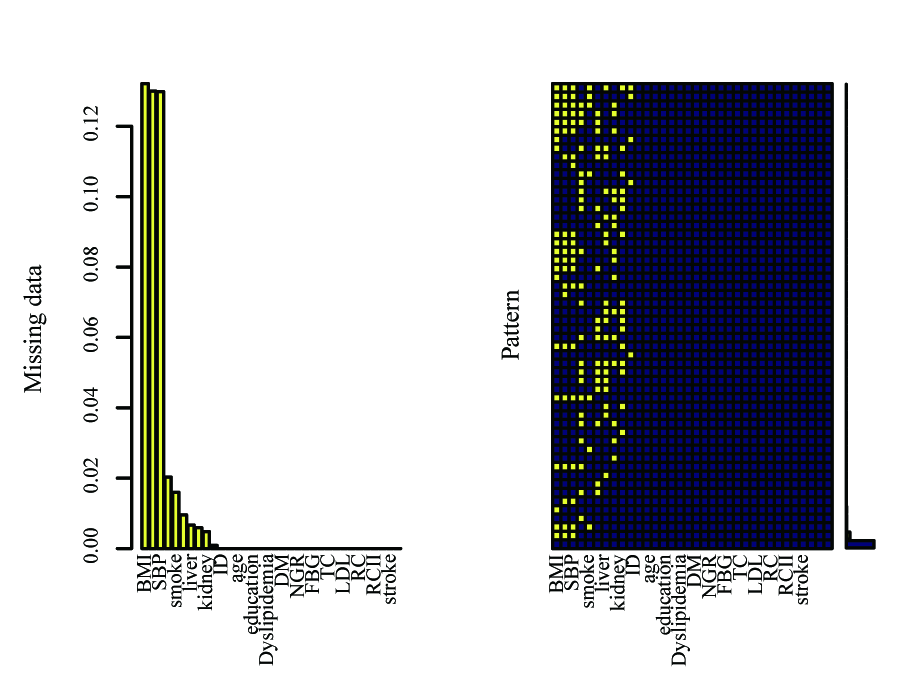


Figure. S2 Distribution of variables with missing data.

Abbreviations: BMI, body mass index; SBP, systolic blood pressure; NGR, normal glucose regulation; DM, diabetes mellitus; FBG, fasting blood glucose; TC,total cholesterol; LDL, low-density lipoprotein; RC: Residual cholesterol; RCII, remnant cholesterol inflammatory index.
