# Supplementary material for: Residual Cholesterol Inflammation Index as a Predictive Biomarker for Stroke Risk in Middle-Aged and Elderly Individuals: Insights from the China Health and Retirement Longitudinal Study
Source: Research Square preprint supplement (doi:10.21203/rs.3.rs-8788904/v1), 2026-02-16
Supplement: Supplementary file 27 [file dc10c48c1e516c5c06038bfb.docx]

| Table S22 Distribution of variables with missing data | | |
| --- | --- | --- |
| variables | Number of Missing | Missing proportion |
| BMI | 1049 | 13.21% |
| SBP | 1031 | 12.98% |
| DBP | 1032 | 12.99% |
| Kidney disease | 38 | 0.48% |
| Liver disease | 53 | 0.67% |
| Lipid-lowering treatment | 161 | 2.03% |
| Antihypertensive treatment | 47 | 0.59% |
| Hypoglycemic treatment | 76 | 0.96% |
| Smoking status | 127 | 1.59% |
| Drinking status | 7 | 0.09% |

Abbreviations: BMI, body mass index; SBP, systolic blood pressure; DBP, diastolic blood pressure.
