# Supplementary material for: Residual Cholesterol Inflammation Index as a Predictive Biomarker for Stroke Risk in Middle-Aged and Elderly Individuals: Insights from the China Health and Retirement Longitudinal Study
Source: Research Square preprint supplement (doi:10.21203/rs.3.rs-8788904/v1), 2026-02-16
Supplement: Supplementary file 28 [file e41c72e94abc7edc1d4fc561.docx]

Table 1 Patient demographics and baseline characteristics

| Characteristic | RCII quartiles | | | | | p |
| --- | --- | --- | --- | --- | --- | --- |
| Overall | Q1 | Q2 | Q3 | Q4 |
| No. of subjects | 7940 | 1986 | 1984 | 1985 | 1985 |  |
| Gender (%) |  |  |  |  |  | 0.063 |
| Male | 3616 (45.5) | 892 ( 44.9) | 926 ( 46.7) | 937 ( 47.2) | 861 (43.4) |  |
| Female | 4324 (54.5) | 1094 ( 55.1) | 1058 ( 53.3) | 1048 ( 52.8) | 1124 (56.6) |  |
| Age,year(mean (SD)) | 58.23 (8.71) | 57.73 (8.90) | 57.97 (8.49) | 58.64 (8.75) | 58.56 (8.69) | 0.001 |
| Marital status (%) |  |  |  |  |  | 0.262 |
| Marryed | 6743 (84.9) | 1670 (84.1) | 1691 (85.2) | 1709 (86.1) | 1673 (84.3) |  |
| Other | 1197 (15.1) | 316 (15.9) | 293 (14.8) | 276 (13.9) | 312 (15.7) |  |
| Education level (%) |  |  |  |  |  | 0.115 |
| Elementary school or below | 5523 (69.6) | 1389 ( 69.9) | 1389 ( 70.0) | 1382 ( 69.6) | 1363 (68.7) |  |
| Middle school | 2188 (27.6) | 556 ( 28.0) | 540 ( 27.2) | 544 (27.4) | 548 (27.6) |  |
| College or above | 229 ( 2.9) | 41 ( 2.1) | 55 ( 2.8) | 59 ( 3.0) | 74 ( 3.7) |  |
| Residence (%) |  |  |  |  |  | <0.001 |
| Rural | 6688 (84.2) | 1738 ( 87.5) | 1700 ( 85.7) | 1647 (83.0) | 1603 (80.8) |  |
| Urban | 1252 (15.8) | 248 ( 12.5) | 284 ( 14.3) | 338 (17.0) | 382 (19.2) |  |
| BMI,kg/m2 (median (IQR)) | 23.22[20.95,25.84] | 21.73[19.99,23.88] | 22.97[20.78,25.25] | 23.88[21.63,26.46] | 24.60[22.14,27.42] | <0.001 |
| SBP,mmHg (mean (SD)) | 128.19(20.77) | 124.27(19.52) | 126.48 (20.57) | 130.33(21.06) | 131.69(21.05) | <0.001 |
| DBP,mmHg (mean (SD)) | 74.88 (12.06) | 72.44 (11.63) | 74.02 (11.97) | 75.87 (12.13) | 77.20 (11.98) | <0.001 |
| Smoking status (%) |  |  |  |  |  | 0.007 |
| Never | 4944 (62.3) | 1281 ( 64.5) | 1223 ( 61.6) | 1195 ( 60.2) | 1245 ( 62.7) |  |
| Former | 629 ( 7.9) | 122 ( 6.1) | 157 ( 7.9) | 175 ( 8.8) | 175 ( 8.8) |  |
| Current | 2367 (29.8) | 583 ( 29.4) | 604 ( 30.4) | 615 ( 31.0) | 565 ( 28.5) |  |
| Drinking status (%) |  |  |  |  |  | 0.073 |
| Never | 4882 (61.5) | 1239 ( 62.4) | 1194 ( 60.2) | 1225 ( 61.7) | 1224 ( 61.7) |  |
| Former | 626 ( 7.9) | 124 ( 6.2) | 167 ( 8.4) | 164 ( 8.3) | 171 ( 8.6) |  |
| Current | 2432 (30.6) | 623 ( 31.4) | 623 ( 31.4) | 596 ( 30.0) | 590 ( 29.7) |  |
| Dyslipidemia (%) | 3820 (48.1) | 429 ( 21.6) | 786 ( 39.6) | 1135 ( 57.2) | 1470 ( 74.1) | <0.001 |
| Hypertension (%) | 3008 (37.9) | 552 ( 27.8) | 648 ( 32.7) | 853 ( 43.0) | 955 ( 48.1) | <0.001 |
| Diabetes (%) | 1267 (16.0) | 184 ( 9.3) | 242 ( 12.2) | 338 ( 17.0) | 503 ( 25.3) | <0.001 |
| Kidney disease (%) | 447 ( 5.6) | 105 ( 5.3) | 119 ( 6.0) | 106 ( 5.3) | 117 ( 5.9) | 0.678 |
| Liver diseasee (%) | 265 ( 3.3) | 78 ( 3.9) | 54 ( 2.7) | 73 ( 3.7) | 60 ( 3.0) | 0.122 |
| Lipid-lowering treatment (%) | 395(5.0) | 59(3.0) | 70(3.5) | 114(5.7) | 152(7.7) | <0.001 |
| Antihypertensive treatment (%) | 1457 (18.4) | 225 ( 11.3) | 299 ( 15.1) | 427 (21.5) | 506 (25.5) | <0.001 |
| Hypoglycemic treatment(%) | 285 ( 3.6) | 45 ( 2.3) | 39 ( 2.0) | 83 (4.2) | 118 (5.9) | <0.001 |
| HbA1c,%(mean (SD)) | 5.25 (0.78) | 5.13 (0.59) | 5.16 (0.61) | 5.28 (0.79) | 5.44 (1.02) | <0.001 |
| FBG (median (IQR)) | 102.24[94.32,112.68] | 99.18[92.70,106.92] | 101.16[93.60,109.98] | 102.78[94.50, 113.76] | 107.10[97.92, 122.40] | <0.001 |
| TG,mg/dl (median (IQR)) | 105.32[75.22,153.99] | 73.01[57.53,91.15] | 100.00[77.00, 30.32] | 125.67 [92.04, 167.26] | 164.61[109.74, 246.03] | <0.001 |
| TC,mg/dl (median (IQR)) | 190.59[167.40,214.95] | 183.25[161.60,206.44] | 189.43[166.62, 211.08] | 193.69[170.10, 219.59] | 196.39[170.88, 224.61] | <0.001 |
| HDL-c,mg/dl (median (IQR)) | 49.48 [40.59, 59.92] | 58.76[49.87, 8.72] | 51.80[43.30,61.08] | 47.17 [39.43, 55.67] | 40.98[34.02, 50.26] | <0.001 |
| LDL-c,mg/dl (median (IQR)) | 114.43[93.56,137.24] | 113.27[95.10,134.15] | 116.37[95.01,37.63] | 117.53[97.04, 141.11] | 111.34[87.76, 5.70] | <0.001 |
| hs-CRP,mg/l (median (IQR)) | 0.98 [0.53, 1.99] | 0.44 [0.31, 0.63] | 0.70[0.49, 1.00] | 1.25[0.88,1.84] | 3.11 [1.92, 5.41] | <0.001 |
| RC,mg/dl (median (IQR)) | 19.72 [11.21, 31.70] | 8.51 [4.25, 13.43] | 17.78[12.37,25.13] | 24.74 [17.01, 34.41] | 34.41 [22.81, 55.67] | <0.001 |
| RCII (median (IQR)) | 1.94 [0.79, 5.07] | 0.40 [0.22, 0.58] | 1.24[1.01, 1.55] | 3.04[2.41, .87] | 10.04 [7.00, 18.08] | <0.001 |
| stroke (%) | 611 ( 7.7) | 108 ( 5.4) | 131 ( 6.6) | 165 ( 8.3) | 207 ( 10.4) | <0.001 |

Abbreviations: BMI, body mass index; SBP, systolic blood pressure; DBP, diastolic blood pressure; HbA1c, glycosylated hemoglobin A1c; FBG, fasting blood glucose; TG, triglyceride; TC,total cholesterol; HDL-c, high-density lipoprotein cholesterol; LDL-c, low-density lipoprotein cholesterol; hs-CRP: high-sensitivity C-reactive protein; RC: Residual cholesterol; RCII: Residual cholesterol inflammatory index.

Values are presented as mean ± SD, median (IQR), or n (%), as appropriate. P-values were calculated using t-test, Mann-Whitney U test, or chi-square test as applicable. P-values < 0.05 were considered statistically significant.
