# Supplementary material for: Residual Cholesterol Inflammation Index as a Predictive Biomarker for Stroke Risk in Middle-Aged and Elderly Individuals: Insights from the China Health and Retirement Longitudinal Study
Source: Research Square preprint supplement (doi:10.21203/rs.3.rs-8788904/v1), 2026-02-16
Supplement: Supplementary file 29 [file e9a23b49688f60e435815c68.docx]

| Table S5 Association between the cumRCII and stroke incidence | | | | | | |
| --- | --- | --- | --- | --- | --- | --- |
| RCII | Quartiles | | | | | Continuous |
| Quartile1 | Quartile2 | Quartile3 | Quartile4 | P for trend | Per 1SD increase |
| Crude,OR(95%CI) | Reference | 1.225(0.888,1.695) | 1.377(1.006,1.894) | 1.846(1.372,2.503) | <0.001 | 1.184(1.088,1.280) |
| Model1,OR(95%CI) | Reference | 1.187(0.859,1.645) | 1.322(0.964,1.821) | 1.769(1.311,2.404) | <0.001 | 1.170(1.074,1.267) |
| Model2,OR(95%CI) | Reference | 1.033(0.743,1.440) | 1.009(0.725,1.409) | 1.191(0.859,1.660) | 0.117 | 1.076(0.978,1.176) |

Crude: unadjusted for any covariates;

Model 1: adjusted for age, gender, smoking status, drinking status, residence, education level and marital status;

Model 2: adjusted for variables included in Model 2 and SBP, DBP, BMI, hypertension, dyslipidemia, diabetes, liver disease and kidney disease.

Abbreviations: BMI, body mass index; SBP, systolic blood pressure; DBP, diastolic blood pressure; cumRCII: cumulative remnant cholesterol inflammatory index; OR, odds ratio; CI, confidence interval; SD, standard deviation.
